# Supplementary material for: Combining transcatheter arterial embolization with iodized oil containing Apatinib inhibits HCC growth and metastasis
Source: PubMed Central journal article supplement (PMC7031235; doi:10.1038/s41598-020-59746-1), 2020-02-19

## Title

Combining transcatheter arterial embolization with iodized oil containing Apatinib inhibits HCC growth and metastasis

Western Blot original data

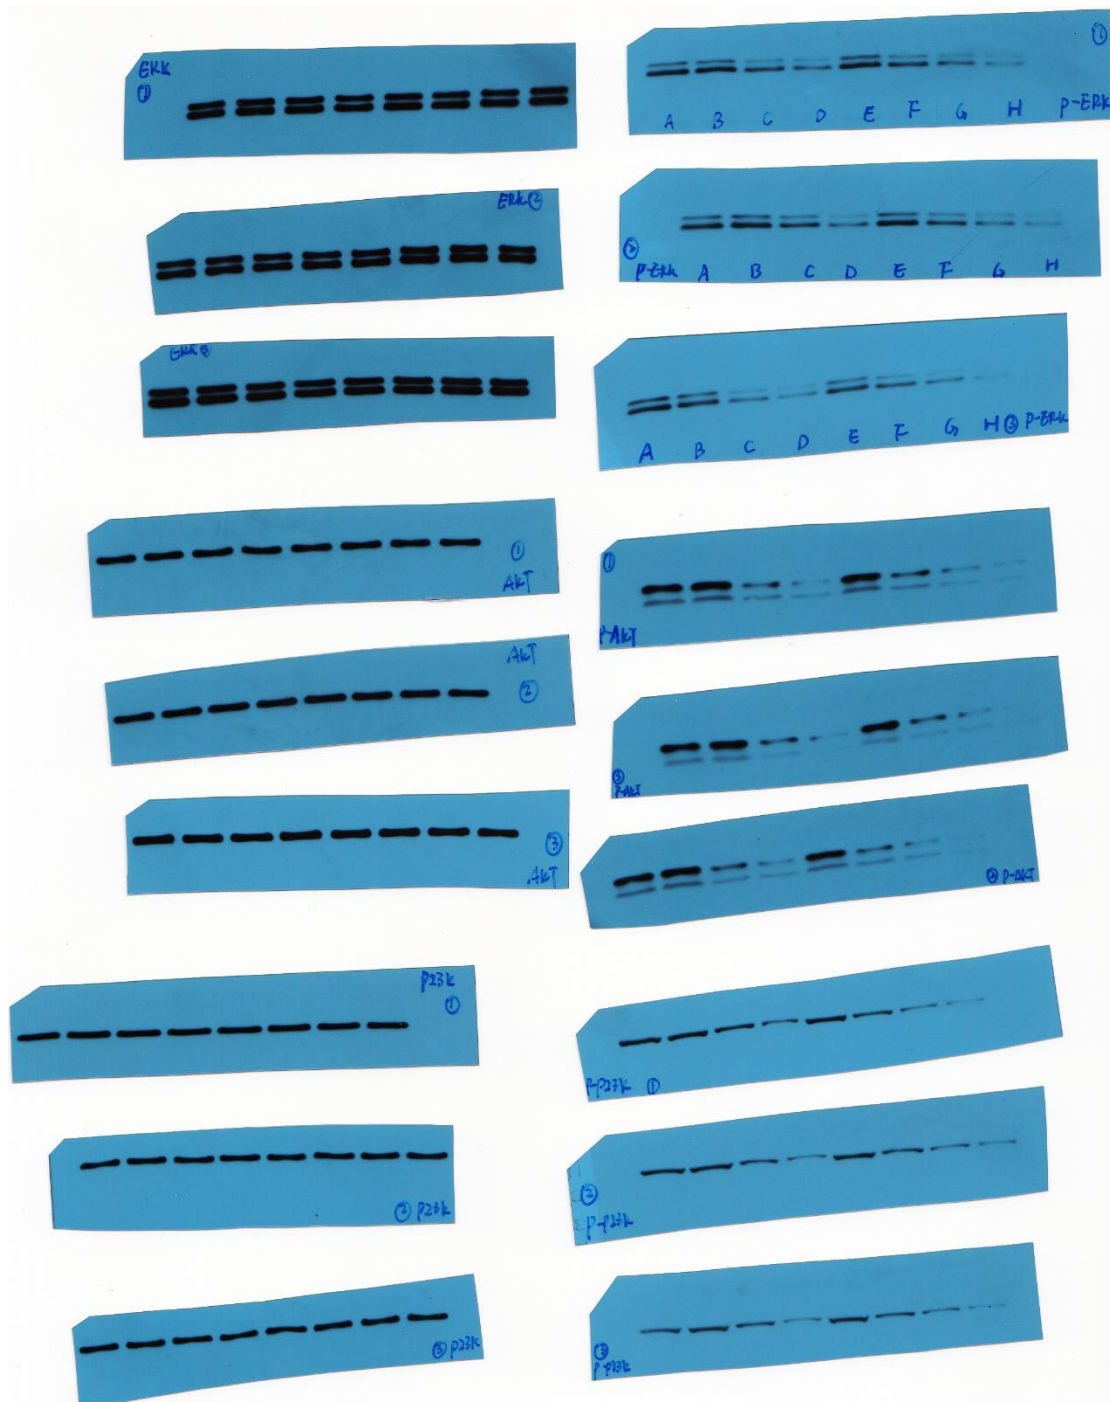

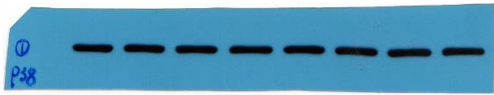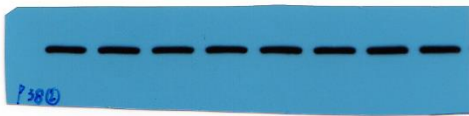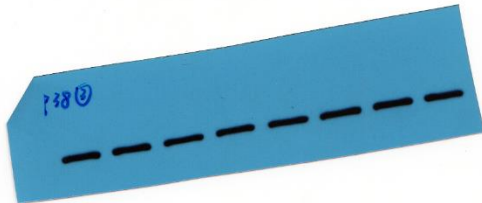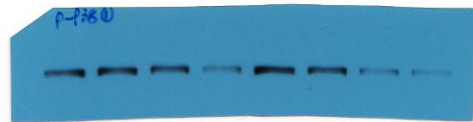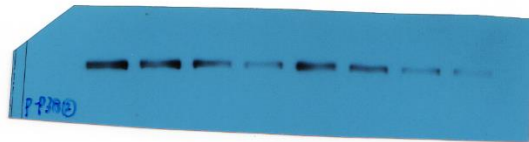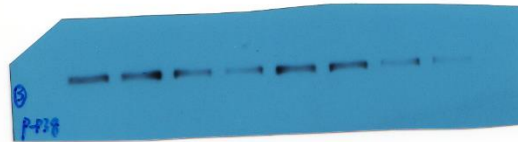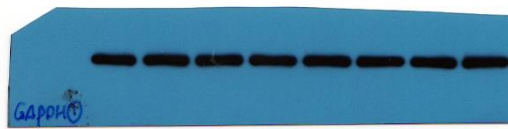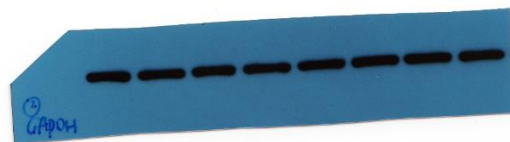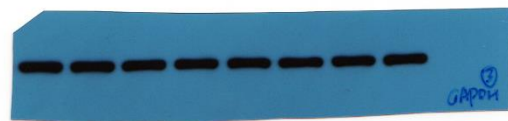

Supplement: 41598_2020_59746_MOESM1_ESM.pdf [file 41598_2020_59746_MOESM1_ESM.pdf]
